# Supplementary material
Source: publisher site journal article supplement (https://www.dovepress.com/article/280434)
Supplement: Supplementary file 1 [file get_supplementary_file.php]

**Upregulated *circPDK1* promotes RCC cell migration and invasion by regulating the *miR-377-3P-NOTCH1* axis in** **renal cell carcinoma**

Zhenlin Huang, Yinghui Ding, Lu Zhang, Siyuan He, Zhangkui Jia, Chaohui Gu, Tao Wang, Hao Li, Xiang Li, Zhibo Jin, Yafei Ding, Jinjian Yang

**Table S1. The primer sequences included in this study.**

| h-circRNA9781_qPCR_124bp_F1 | CAGCACTCTTTATTGTTTGGTGG |
| --- | --- |
| h-circRNA9781_qPCR_124bp_R1 | TCCTGAAGACTCTGGATATACCTTT |
| h-circRNA5811_qPCR_77bp_F1 | TGAAGGAGCAATATGATGCTGA |
| h-circRNA5811_qPCR_77bp_R1 | GGTTCACTGTTCCAGCTTGGT |
| h-circRNA5511_qPCR_118bp_F1 | AGTCGCAAGAAGCAAAGATATTGAG |
| h-circRNA5511_qPCR_118bp_R1 | CTGAAACATTGGTTGTAAAGGAGAC |
| h-circRNA4026_qPCR_140bp_F1 | GGAGTTCTTCCACCACCAGC |
| h-circRNA4026_qPCR_140bp_R1 | AGGCAATGTTGAGAGGCAGAG |
| h-circRNA4007_qPCR_71bp_F1 | TGGAGATGCTGCTAAAGGAACA |
| h-circRNA4007_qPCR_71bp_R1 | CAAAGCGTGGAAACTGATGATT |
| h-circRNA2976_qPCR_66bp_F1 | CTCAGACGTGCAGTACACGGA |
| h-circRNA2976_qPCR_66bp_R1 | TGGTACTGCTGGCCTTTGTG |
| h-circRNA1526_qPCR_94bp_F1 | GATGGGATTCACTGTCTTGGTC |
| h-circRNA1526_qPCR_94bp_R1 | GCTCATAATTGGTTCCTTCTGTGT |
| h-circRNA1363_qPCR_85bp_F1 | CATTGCCATTTTCACATAGGGA |
| h-circRNA1363_qPCR_85bp_R1 | CAGTTCTTCTTTGTGTTTGGGTCA |
| h-circRNA12132_qPCR_93bp_F1 | GCTATGAAAATGCTAGGCGTCT |
| h-circRNA12132_qPCR_93bp_R1 | CACAAGCATTCACTGATCCATTTAG |
| h-circRNA1210_qPCR_149bp_F1 | CGGAAAAGCTCGAGGACTCT |
| h-circRNA1210_qPCR_149bp_R1 | TGCTAAGGAATCCAAGCATGG |
| h-circRNA3415_qPCR_89bp_F1 | GCTGGTGCGAGCTACGACTT |
| h-circRNA3415_qPCR_89bp_R1 | AGCTTGTGCGCATCAAAGAG |
| GAPDH FORWARD | ACCCACTCCTCCACCTTTGAC |
| GAPDH REVERSE | TGTTGCTGTAGCCAAATTCGTT |
| NOTCH1 FORWARD | TGCGAGACCAACATCAACGAGTG |
| NOTCH1 REVERSE | TCAGGCAGAAGCAGAGGTAGGC |
| circRNA12132 FISH probe | ACAGGAGCCCAAGGA+TGCCAAC |
|  |  |

**Ta****ble S2. Expression of the top 20 abnormally expressed genes**

| Target | Mean Expresison ccRCC/ Mean Expression PC | Log2fold_change | P-value |
| --- | --- | --- | --- |
| circRNA12132 | 6.305749116 | 2.656667771 | 0.002011037 |
| circRNA9781 | 6.271871621 | 2.648896029 | 0.002974917 |
| circRNA4008 | 5.359397516 | 2.422070827 | 0.000827127 |
| circRNA4007 | 4.825855347 | 2.270784672 | 0.001039855 |
| circRNA2976 | 4.419485725 | 2.1438785 | 0.00519185 |
| circRNA3415 | 3.381608124 | 1.757709483 | 0.002350768 |
| circRNA5379 | 2.2143132 | 1.146859296 | 0.03658289 |
| circRNA5349 | 0.411071521 | -1.28253867 | 0.00150052 |
| circRNA210 | 0.372128458 | -1.42612737 | 0.005562343 |
| circRNA5511 | 0.306219767 | -1.707360682 | 0.000646081 |
| circRNA4026 | 0.252529545 | -1.985475907 | 0.039527463 |
| circRNA1363 | 0.233189649 | -2.100424345 | 0.013061762 |
| circRNA701 | 0.227628292 | -2.135248216 | 0.003354097 |
| circRNA3156 | 0.223730101 | -2.160168723 | 0.003278593 |
| circRNA5811 | 0.219873284 | -2.185255775 | 0.00341217 |
| circRNA6927 | 0.182106876 | -2.4571427 | 0.00607727 |
| circRNA1853 | 0.176280996 | -2.504051146 | 0.003233092 |
| circRNA1513 | 0.161250697 | -2.632622694 | 0.002672538 |
| circRNA2326 | 0.025013596 | -5.321143719 | 0.004890198 |
| circRNA1526 | 0.007567577 | -7.045952785 | 0.028319258 |

**Supplementary information 1.** ***circPDK1*** **sequence**

GATCAGTGAATGCTTGTGAAAAGACCTCATTTATGTTTCTGCGGCAAGAGTTGCCTGTCAGACTGGCAAATATAATGAAAGAAATAAGTCTCCTTCCAGATAATCTTCTCAGGACACCATCCGTTCAATTGGTACAAAGCTGGTATATCCAGAGTCTTCAGGAGCTTCTTGATTTTAAGGACAAAAGTGCTGAGGATGCTAAAGCTATTTATGACTTTACAGATACTGTGATACGGATCAGAAACCGACACAATGATGTCATTCCCACAATGGCCCAGGGTGTGATTGAATACAAGGAGAGCTTTGGGGTGGATCCTGTCACCAGCCAGAATGTTCAGTACTTTTTGGATCGATTCTACATGAGTCGCATTTCAATTAGAATGTTACTCAATCAGCACTCTTTATTGTTTGGTGGAAAAGGCAAAGGAAGTCCATCTCATCGAAAACACATTGGAAGCATAAATCCAAACTGCAATGTACTTGAAGTTATTAAAGATGGCTATGAAAATGCTAGGCGTCTGTGTGATTTGTATTATATTAACTCTCCCGAACTAGAACTTGAAGAACTAAATG

**Table S3. Correlation between *circPDK1* and RCC patients**

|  | Relative circPDK1 expression | Genda | Age | Pathological grading | Tumor size | TNM stage | Tumor stage | lymphatic metastasis* | Other organ transfer* |
| --- | --- | --- | --- | --- | --- | --- | --- | --- | --- |
| A1 | 0.299993 | Male | 70 | II | 6.00 | T1bN0M0 | I | No | No |
| A2 | 0.680657 | Male | 72 | II | 7.90 | T2aN0M0 | II | No | No |
| A3 | 3.271608 | Male | 45 | II | 8.30 | T2aN0M0 | II | No | No |
| A4 | 1.252664 | Male | 61 | II | 8.60 | T2aN0M0 | II | No | No |
| A5 | 1.071773 | Male | 46 | II | 9.00 | T2aN0M0 | II | No | No |
| A6 | 1.345367 | Female | 51 | II | 6.90 | T1bN0M0 | I | No | No |
| A7 | 0.525222 | Female | 61 | II | 5.00 | T1aN0M0 | I | No | No |
| A8 | 0.832776 | Female | 59 | II | 8.00 | T2aN0M0 | II | No | No |
| A9 | 0.44013 | Male | 46 | II | 6.40 | T1bN0M0 | II | No | No |
| B1 | 0.770571 | Female | 66 | II | 9.00 | T2aN0M0 | II | No | No |
| B2 | 1.012546 | Female | 56 | II | 8.30 | T2aN0M0 | II | No | No |
| B3 | 0.209062 | Male | 47 | III | 11.00 | T2bN0M0 | II | No | No |
| B4 | 0.573951 | Male | 54 | III | 11.00 | T2bN0M0 | II | No | No |
| B5 | 1.210833 | Male | 65 | III | 8.20 | T2aN0M0 | II | No | No |
| B6 | 0.575146 | Male | 28 | III | 13.40 | T3aN0M0 | III | No | No |
| B7 | 1.262252 | Female | 58 | III | 3.90 | T1aN0M0 | I | No | No |
| B8 | 0.642158 | Female | 71 | III | 1.60 | T1aN0M0 | I | No | No |
| B9 | 1.452965 | Male | 70 | I | 2.00 | T1aN0M0 | I | No | No |
| C1 | 0.628507 | Male | 36 | I | 3.10 | T1aN0M0 | I | No | No |
| C2 | 0.143388 | Male | 35 | I | 4.70 | T1bN0M0 | I | No | No |
| C3 | 0.348928 | Female | 43 | I | 6.90 | T1bN0M0 | I | No | No |
| C4 | 2.306971 | Male | 50 | I | 3.40 | T1aN0M0 | I | No | No |
| C5 | 2.969047 | Male | 67 | I | 5.00 | T1bN0M0 | I | No | No |
| C6 | 0.823591 | Female | 70 | IV | 5.00 | T1bN0M0 | I | No | No |
| C7 | 0.946058 | Female | 34 | IV | 7.00 | T1bN0M0 | I | No | No |
| C8 | 0.216885 | Female | 53 | IV | 9.40 | T2aN0M0 | II | No | No |
| C9 | 0.115663 | Male | 50 | IV | 11.00 | T2bN0M1 | IV | No | Yes |
| D1 | 0.244855 | Male | 59 | IV | 7.90 | T4N0M0 | IV | No | No |
| D2 | 0.209642 | Male | 62 | IV | 5.50 | T1bN0M0 | I | No | No |
| D3 | 3.600008 | Male | 67 | II | 3.00 | T1aN0M1 | IV | No | Yes |
| D4 | 4.198867 | Female | 49 | II | 7.70 | T4N0M1 | IV | No | Yes |
| D5 | 1.220101 | Male | 47 | II | 11.00 | T4NXM1 | IV | No | Yes |
| D6 | 1.853176 | Female | 60 | II | 4.00 | T1aN1M1 | IV | Yes | Yes |
| D7 | 1.009052 | Male | 55 | II | 5.00 | T1bN1M0 | IV | Yes | No |
| D8 | 0.613868 | Female | 64 | II | 10.10 | T4N0M0 | IV | No | No |
| D9 | 0.91955 | Male | 59 | I | 6.40 | T1bN0M0 | I | No | No |
| E1 | 0.604578 | Male | 40 | I | 9.80 | T2aN0M0 | II | No | No |
| E2 | 0.645281 | Male | 46 | I | 2.30 | T1aN0M0 | I | No | No |
| E3 | 0.973329 | Male | 49 | I | 4.50 | T1bN0M0 | I | No | No |
| E4 | 1.048262 | Male | 38 | I | 5.60 | T1aN0M0 | I | No | No |
| E5 | 4.531536 | Male | 43 | I | 9.60 | T2aN0M0 | II | No | No |
| E6 | 0.958599 | Male | 50 | I | 9.30 | T3aN0M0 | III | No | No |
| E7 | 0.609628 | Female | 50 | II | 11.10 | T2bN0M0 | II | No | No |
| E8 | 0.031929 | Female | 51 | II | 11.40 | T2bN0M0 | II | No | No |
| E9 | 0.687294 | Male | 51 | II | 12.50 | T3N0M0 | III | No | No |
| F1 | 0.19999 | Female | 31 | III | 5.00 | T1bN0M0 | I | No | No |
| F2 | 0.514057 | Male | 70 | III | 2.30 | T1aN0M0 | I | No | No |
| F3 | 0.911933 | Female | 68 | III | 5.70 | T1bN0M0 | I | No | No |
| F4 | 0.321302 | Male | 54 | III | 2.50 | T1aN0M0 | I | No | No |
| F5 | 2.77214 | Female | 66 | II | 8.60 | T4N0M0 | IV | No | No |
| F6 | 0.622437 | Female | 57 | II | 8.30 | T4NXM0 | IV | No | No |
| F7 | 1.177723 | Male | 65 | II | 7.30 | T2aN0M1 | IV | No | Yes |
| F8 | 0.114387 | Male | 66 | II | 8.00 | T4N0M0 | IV | No | No |
| F9 | 1.337928 | Male | 64 | II | 10.00 | T3bN0M1 | IV | No | Yes |
| G1 | 9.006709 | Male | 43 | III | 19.00 | T3aN0M1 | IV | No | Yes |
| G2 | 3.228804 | Male | 64 | III | 11.30 | T3aN0M1 | IV | No | Yes |
| G3 | 0.862144 | Male | 40 | II | 2.80 | T1N0M1 | IV | No | Yes |
| G4 | 2.475981 | Male | 52 | III | 4.90 | T1bN1M1 | IV | Yes | Yes |
| G5 | 1.139973 | Female | 64 | IV | 3.00 | T1aN0M0 | I | No | No |
| G6 | 1.871247 | Male | 58 | III-IV | 4.00 | T1aN0M0 | I | No | No |

**Supplementary Table S4. *CircPDK1* target miRNAs and correlation scores.**

| circRNA | Target miRNA | Site Type | TargetScan_score | TargetScan_score_percentile | miranda_score | miranda_Energy |
| --- | --- | --- | --- | --- | --- | --- |
| circRNA12132 | hsa-miR-103b | 8mer | -0.50 | 99 | 155.00 | -13.30 |
| circRNA12132 | hsa-miR-1193 | m8 | -0.16 | 67 | 154.00 | -14.58 |
| circRNA12132 | hsa-miR-1200 | m8 | -0.28 | 85 | 142.00 | -14.61 |
| circRNA12132 | hsa-miR-1250-3p | m8 | -0.31 | 78 | 153.00 | -11.89 |
| circRNA12132 | hsa-miR-1253 | 8mer | -0.42 | 97 | 151.00 | -12.26 |
| circRNA12132 | hsa-miR-1273f | 8mer | -0.42 | 97 | 145.00 | -15.45 |
| circRNA12132 | hsa-miR-1278 | m8 | -0.25 | 85 | 154.00 | -14.01 |
| circRNA12132 | hsa-miR-1297 | 8mer | -0.40 | 95 | 152.00 | -13.38 |
| circRNA12132 | hsa-miR-1299 | m8 | -0.16 | 58 | 140.00 | -11.63 |
| circRNA12132 | hsa-miR-138-5p | m8 | -0.20 | 73 | 154.00 | -21.23 |
| circRNA12132 | hsa-miR-144-3p | m8 | -0.16 | 55 | 149.00 | -11.52 |
| circRNA12132 | hsa-miR-203a-3p | 8mer | -0.34 | 94 | 141.00 | -11.92 |
| circRNA12132 | hsa-miR-2115-5p | 8mer | -0.48 | 99 | 150.00 | -17.20 |
| circRNA12132 | hsa-miR-22-5p | m8 | -0.31 | 82 | 152.00 | -15.18 |
| circRNA12132 | hsa-miR-2355-3p | 8mer | -0.45 | 98 | 156.00 | -17.26 |
| circRNA12132 | hsa-miR-26a-5p | 1a | -0.15 | 54 | 147.00 | -14.34 |
| circRNA12132 | hsa-miR-26b-5p | 1a | -0.15 | 54 | 153.00 | -15.06 |
| circRNA12132 | hsa-miR-27a-3p | m8 | -0.29 | 86 | 153.00 | -14.52 |
| circRNA12132 | hsa-miR-27b-3p | m8 | -0.29 | 86 | 154.00 | -14.52 |
| circRNA12132 | hsa-miR-3064-5p | 8mer | -0.32 | 91 | 150.00 | -21.12 |
| circRNA12132 | hsa-miR-3121-5p | 8mer | -0.37 | 91 | 172.00 | -24.27 |
| circRNA12132 | hsa-miR-3151-3p | 8mer | -0.36 | 91 | 144.00 | -17.70 |
| circRNA12132 | hsa-miR-3192-3p | 8mer | -0.31 | 91 | 150.00 | -14.34 |
| circRNA12132 | hsa-miR-335-3p | m8 | -0.20 | 68 | 143.00 | -19.10 |
| circRNA12132 | hsa-miR-3620-3p | m8 | -0.13 | 53 | 140.00 | -16.75 |
| circRNA12132 | hsa-miR-3653-5p | m8 | -0.26 | 84 | 163.00 | -19.44 |
| circRNA12132 | hsa-miR-3660 | 8mer | -0.32 | 90 | 152.00 | -22.03 |
| circRNA12132 | hsa-miR-3668 | m8 | -0.28 | 87 | 169.00 | -16.76 |
| circRNA12132 | hsa-miR-3686 | m8 | -0.27 | 79 | 156.00 | -13.89 |
| circRNA12132 | hsa-miR-374b-5p | m8 | -0.21 | 70 | 160.00 | -10.53 |
| circRNA12132 | hsa-miR-377-3p | m8 | -0.20 | 69 | 155.00 | -14.89 |
| circRNA12132 | hsa-miR-383-3p | 8mer | -0.43 | 99 | 141.00 | -15.40 |
| circRNA12132 | hsa-miR-3928-5p | m8 | -0.21 | 76 | 157.00 | -17.84 |
| circRNA12132 | hsa-miR-4251 | m8 | -0.15 | 50 | 142.00 | -13.66 |
| circRNA12132 | hsa-miR-4289 | 8mer | -0.34 | 92 | 145.00 | -14.32 |
| circRNA12132 | hsa-miR-4292 | m8 | -0.15 | 63 | 151.00 | -26.71 |
| circRNA12132 | hsa-miR-4324 | 8mer | -0.41 | 97 | 145.00 | -10.44 |
| circRNA12132 | hsa-miR-4428 | m8 | -0.16 | 58 | 145.00 | -12.03 |
| circRNA12132 | hsa-miR-4432 | m8 | -0.21 | 78 | 156.00 | -19.22 |
| circRNA12132 | hsa-miR-4522 | m8 | -0.21 | 73 | 150.00 | -18.71 |
| circRNA12132 | hsa-miR-4526 | 8mer | -0.33 | 90 | 163.00 | -28.21 |
| circRNA12132 | hsa-miR-4528 | 8mer | -0.45 | 98 | 159.00 | -16.34 |
| circRNA12132 | hsa-miR-4533 | 8mer | -0.39 | 95 | 152.00 | -19.84 |
| circRNA12132 | hsa-miR-4661-3p | m8 | -0.20 | 68 | 159.00 | -30.88 |
| circRNA12132 | hsa-miR-4699-5p | m8 | -0.23 | 79 | 142.00 | -12.02 |
| circRNA12132 | hsa-miR-4705 | 8mer | -0.32 | 87 | 149.00 | -18.52 |
| circRNA12132 | hsa-miR-4724-5p | 8mer | -0.40 | 97 | 140.00 | -13.67 |
| circRNA12132 | hsa-miR-4742-5p | m8 | -0.18 | 64 | 140.00 | -13.93 |
| circRNA12132 | hsa-miR-4762-3p | 8mer | -0.26 | 82 | 147.00 | -15.50 |
| circRNA12132 | hsa-miR-4782-5p | m8 | -0.22 | 76 | 151.00 | -18.24 |
| circRNA12132 | hsa-miR-4803 | m8 | -0.21 | 67 | 148.00 | -10.57 |
| circRNA12132 | hsa-miR-489-3p | m8 | -0.22 | 74 | 145.00 | -17.65 |
| circRNA12132 | hsa-miR-494-3p | m8 | -0.22 | 76 | 155.00 | -10.43 |
| circRNA12132 | hsa-miR-5004-3p | 8mer | -0.44 | 97 | 148.00 | -10.86 |
| circRNA12132 | hsa-miR-5009-5p | m8 | -0.17 | 58 | 154.00 | -13.32 |
| circRNA12132 | hsa-miR-512-3p | m8 | -0.28 | 90 | 141.00 | -14.08 |
| circRNA12132 | hsa-miR-514a-5p | m8 | -0.25 | 86 | 151.00 | -14.19 |
| circRNA12132 | hsa-miR-518c-5p | m8 | -0.28 | 86 | 149.00 | -20.47 |
| circRNA12132 | hsa-miR-5192 | m8 | -0.25 | 87 | 148.00 | -12.95 |
| circRNA12132 | hsa-miR-5196-3p | m8 | -0.24 | 70 | 145.00 | -15.12 |
| circRNA12132 | hsa-miR-543 | 8mer | -0.45 | 98 | 149.00 | -15.14 |
| circRNA12132 | hsa-miR-548av-5p | m8 | -0.23 | 80 | 146.00 | -11.09 |
| circRNA12132 | hsa-miR-548k | m8 | -0.23 | 79 | 162.00 | -15.12 |
| circRNA12132 | hsa-miR-551b-5p | m8 | -0.18 | 61 | 146.00 | -13.21 |
| circRNA12132 | hsa-miR-5584-3p | 8mer | -0.41 | 96 | 146.00 | -11.41 |
| circRNA12132 | hsa-miR-5706 | m8 | -0.26 | 81 | 155.00 | -17.50 |
| circRNA12132 | hsa-miR-576-5p | m8 | -0.22 | 72 | 145.00 | -10.52 |
| circRNA12132 | hsa-miR-599 | m8 | -0.16 | 58 | 161.00 | -13.98 |
| circRNA12132 | hsa-miR-617 | m8 | -0.27 | 85 | 147.00 | -12.73 |
| circRNA12132 | hsa-miR-622 | m8 | -0.23 | 78 | 145.00 | -15.35 |
| circRNA12132 | hsa-miR-643 | m8 | -0.17 | 64 | 153.00 | -10.18 |
| circRNA12132 | hsa-miR-6504-5p | 8mer | -0.31 | 91 | 146.00 | -18.88 |
| circRNA12132 | hsa-miR-6506-3p | m8 | -0.18 | 65 | 151.00 | -15.49 |
| circRNA12132 | hsa-miR-6508-3p | 8mer | -0.33 | 90 | 140.00 | -15.32 |
| circRNA12132 | hsa-miR-6516-3p | m8 | -0.17 | 66 | 155.00 | -10.36 |
| circRNA12132 | hsa-miR-6516-5p | m8 | -0.27 | 86 | 140.00 | -11.97 |
| circRNA12132 | hsa-miR-6716-5p | 8mer | -0.35 | 92 | 142.00 | -16.68 |
| circRNA12132 | hsa-miR-6731-5p | m8 | -0.34 | 94 | 147.00 | -19.12 |
| circRNA12132 | hsa-miR-6746-5p | 8mer | -0.44 | 98 | 140.00 | -15.59 |
| circRNA12132 | hsa-miR-6771-5p | 8mer | -0.48 | 99 | 146.00 | -18.01 |
| circRNA12132 | hsa-miR-6791-5p | m8 | -0.15 | 63 | 146.00 | -25.86 |
| circRNA12132 | hsa-miR-6806-3p | m8 | -0.21 | 76 | 151.00 | -16.52 |
| circRNA12132 | hsa-miR-6842-3p | m8 | -0.20 | 78 | 155.00 | -24.83 |
| circRNA12132 | hsa-miR-6845-3p | m8 | -0.19 | 71 | 140.00 | -14.47 |
| circRNA12132 | hsa-miR-8054 | m8 | -0.20 | 74 | 150.00 | -15.83 |
| circRNA12132 | hsa-miR-8058 | m8 | -0.23 | 76 | 153.00 | -16.34 |
| circRNA12132 | hsa-miR-8085 | m8 | -0.25 | 84 | 148.00 | -17.79 |
| circRNA12132 | hsa-miR-887-3p | 8mer | -0.42 | 97 | 156.00 | -22.00 |
| circRNA12132 | hsa-miR-939-3p | m8 | -0.14 | 60 | 149.00 | -25.29 |
| circRNA12132 | hsa-miR-95-5p | m8 | -0.20 | 64 | 156.00 | -12.83 |
